# Supplementary material for: Synthesis and properties enhancement of metal nanoclusters templated on a biological molecule/ionic liquids complex
Source: Royal Society of Chemistry journal article supplement (doi:10.1039/c7nj00642j), 2017-01-01
Supplement: c7nj00642j1.pdf [file c7nj00642j1.pdf]

## **Electronic Supplementary Information**

### **Synthesis and Properties Enhancement of Metal Nanoclusters**

#### **Templated on Biological Molecule/Ionic Liquids complex**

Wei Wang,<sup>ab</sup> Xiaolun Peng,<sup>a</sup> Huayu Xiong,<sup>a</sup> Wei Wen,<sup>a</sup> Ting Bao,<sup>a</sup> Xiuhua Zhang<sup>a</sup> and Shengfu Wang<sup>\*a</sup>

<sup>a</sup> Hubei Collaborative Innovation Center for Advanced Organic Chemical Materials, Ministry-of-Education Key Laboratory for the Synthesis and Application of Organic Functional Molecules and College of Chemistry and Chemical Engineering, Hubei University, Wuhan, Hubei 430062, China

<sup>b</sup> School of Materials and Chemical Engineering, Hubei University of Technology, Wuhan, Hubei 430068, China

\*Corresponding authors:

Shengfu Wang, wangsf@hubu.edu.cn, fax 88663043

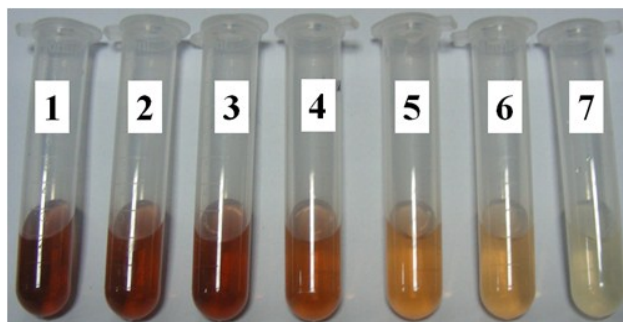

**Figure S1.** The photographs of AgNCs@GSH/[C<sub>4</sub>min] NPs under visible light, which the concentration of [C<sub>4</sub>min][BF<sub>4</sub>] increased by degrees (the volume ratio of water: [C<sub>4</sub>min][BF<sub>4</sub>] from 1 to 7 is 9:1, 7:1, 5:1, 4:1, 3:1, 2:1, 1.5:1 respectively).

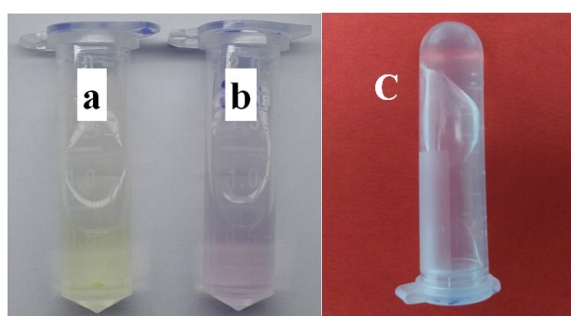

**Figure S2.** The photographs of (a) AuNCs@BSA/[C<sub>4</sub>min], (b) CuNCs@BSA/[C<sub>4</sub>min] and (c) gelatinous AgNCs@GSH/[C<sub>2</sub>min] NPs synthesized in No. 2 concentration (Table S1, a) under visible light.

**Table S1.** The dosage of reagents in the preparation of MNCs(a) AgNCs@GSH/[C<sub>n</sub>mim] NPs with different concentration of [C<sub>n</sub>mim][BF<sub>4</sub>] (*n*=2, 4)

| No. | The Volume Ratio of water: [C <sub>4</sub> mim][BF <sub>4</sub> ] | AgNO <sub>3</sub> (20 mM) | GSH (50 mM) | NaBH <sub>4</sub> (60 mM) | [C <sub>n</sub> mim][BF <sub>4</sub> ] | H <sub>2</sub> O |
|-----|-------------------------------------------------------------------|---------------------------|-------------|---------------------------|----------------------------------------|------------------|
| 1   | 3:1                                                               | 100 μL                    | 120 μL      | 200 μL                    | 450 μL                                 | 1350 μL          |
| 2   | 2:1                                                               | 100 μL                    | 120 μL      | 200 μL                    | 600 μL                                 | 1200 μL          |
| 3   | 1.5:1                                                             | 100 μL                    | 120 μL      | 200 μL                    | 720 μL                                 | 1080 μL          |

(b) AgNCs@GSH/[C<sub>n</sub>mim] (*n*=2, 4)

| AgNO <sub>3</sub> (20 mM) | GSH (50 mM) | NaBH <sub>4</sub> (86 mM) | [C <sub>n</sub> mim][BF <sub>4</sub> ] | H <sub>2</sub> O |
|---------------------------|-------------|---------------------------|----------------------------------------|------------------|
| 30 μL                     | 100 μL      | 100 μL                    | 600 μL                                 | 1200 μL          |

(c) AuNCs@BSA/[C<sub>4</sub>mim]

| HAuCl <sub>4</sub> (50mg/mL) | BSA (20mg/mL) | NaOH (2 M) | [C <sub>4</sub> mim][BF <sub>4</sub> ] | H <sub>2</sub> O |
|------------------------------|---------------|------------|----------------------------------------|------------------|
| 30 μL                        | 450 μL        | 100 μL     | 600 μL                                 | 820 μL           |

(d) CuNCs@BSA/[C<sub>4</sub>mim]

| CuSO <sub>4</sub> (50mM) | BSA (20mg/mL) | NaOH (2 M) | [C <sub>4</sub> mim][BF <sub>4</sub> ] | H <sub>2</sub> O |
|--------------------------|---------------|------------|----------------------------------------|------------------|
| 30 μL                    | 450 μL        | 200 μL     | 600 μL                                 | 720 μL           |

(e) AuNCs@BSA/SDS

| HAuCl <sub>4</sub> (50mg/mL) | BSA (20mg/mL) | NaOH (2 M) | SDS (50 mM) |
|------------------------------|---------------|------------|-------------|
| 30 μL                        | 450 μL        | 100 μL     | 1420 μL     |

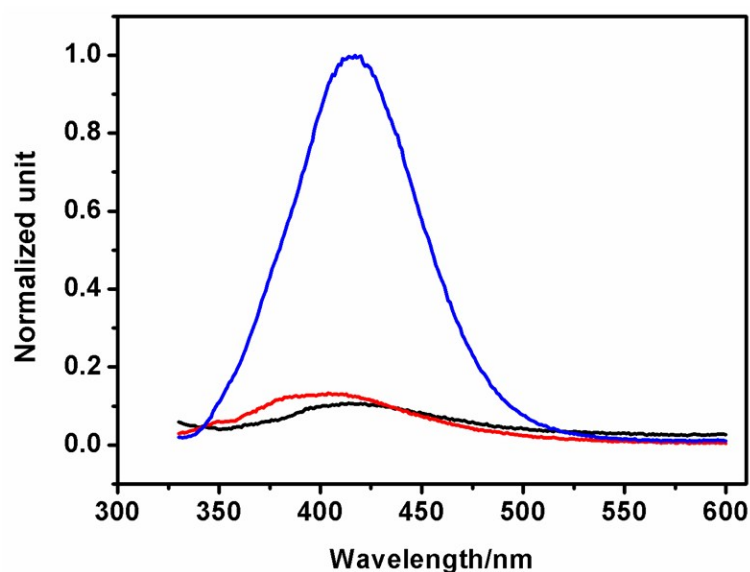

**Figure S3.** The fluorescence spectra of AgNCs@GSH/[C<sub>2</sub>mim] NPs synthesized in No. 2 concentration (blue line), AgNCs@GSH/[C<sub>2</sub>mim] (red line) and AgNCs@GSH/[C<sub>4</sub>mim] (black line). AgNCs@GSH/[C<sub>n</sub>mim] was synthesized in a low concentration (Table S1, b).

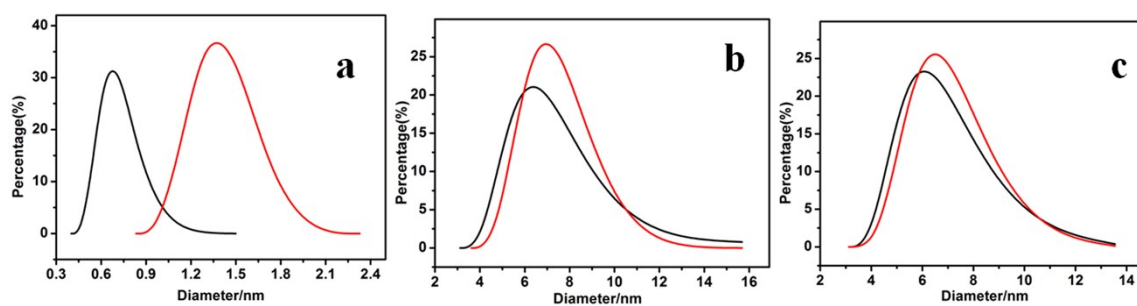

**Figure S4.** The size distribution of MNCs: (a) AgNCs@GSH/[C<sub>2</sub>mim] synthesized in a low concentration (Table S1, b). (b) AuNCs@BSA/[C<sub>4</sub>mim]. (c) CuNCs@BSA/[C<sub>4</sub>mim]. (Red line: MNCs@template molecule, black line: MNCs@template molecule/ILs.)

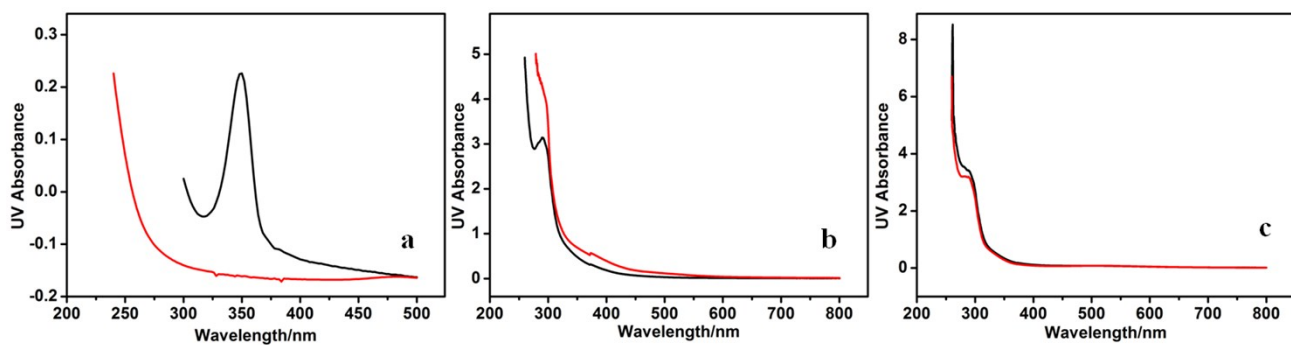

**Figure S5.** The UV/Vis absorption spectra of MNCs

(a) The UV/Vis absorption spectra of AgNCs@GSH/[C<sub>2</sub>mim] NPs (black line) and AgNCs@GSH (red line).

(b) The UV/Vis absorption spectra of AuNCs@BSA/[C<sub>4</sub>mim] (black line) and AuNCs@BSA (red line).

(c) The UV/Vis absorption spectra of CuNCs@BSA/[C<sub>4</sub>mim] (black line) and CuNCs@BSA (red line).

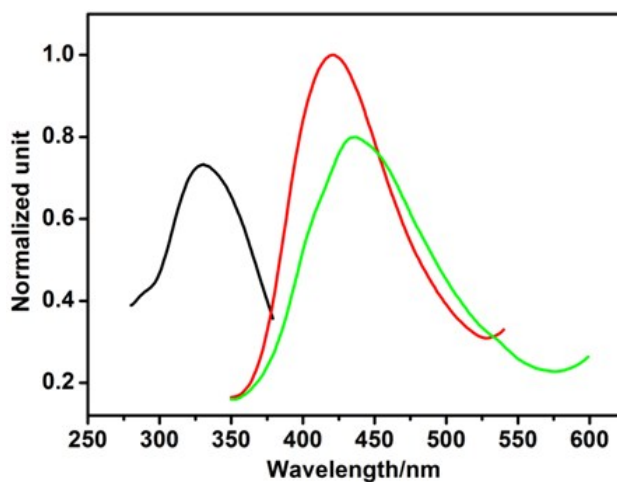

**Figure S6.** The emission spectra (423nm) of AuNCs@BSA (red line), the emission spectra (436nm) of AuNCs@BSA/SDS (green line) and the excitation (327nm) of AuNCs@BSA/SDS (black line).

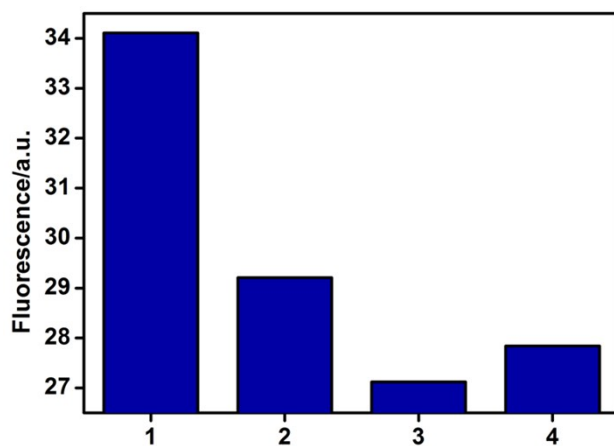

**Figure S7.** The fluorescence intensity of AuNCs@BSA after adding various concentrations of [C<sub>4</sub>mim][BF<sub>4</sub>]. The volumes of the reagents were provided in **Table S2**.

|   | AuNCs@BSA | H <sub>2</sub> O | [C <sub>4</sub> mim][BF <sub>4</sub> ] |
|---|-----------|------------------|----------------------------------------|
| 1 | 210 μL    | 90 μL            | 0 μL                                   |
| 2 | 210 μL    | 80 μL            | 10 μL                                  |
| 3 | 210 μL    | 40 μL            | 50 μL                                  |
| 4 | 210 μL    | 0 μL             | 90 μL                                  |

**Table S3.** The zeta potential of the MNCs

| Sample              | AgNCs@GSH | AgNCs@GSH/<br>[C <sub>2</sub> mim] NPs | AuNCs@BSA | AuNCs@BSA/<br>[C <sub>4</sub> mim] | CuNCs@BSA | CuNCs@BSA/<br>[C <sub>4</sub> mim] |
|---------------------|-----------|----------------------------------------|-----------|------------------------------------|-----------|------------------------------------|
| Zeta potential (mV) | -8.9      | 27.0                                   | -18.0     | -6.5                               | -15.1     | -4.6                               |

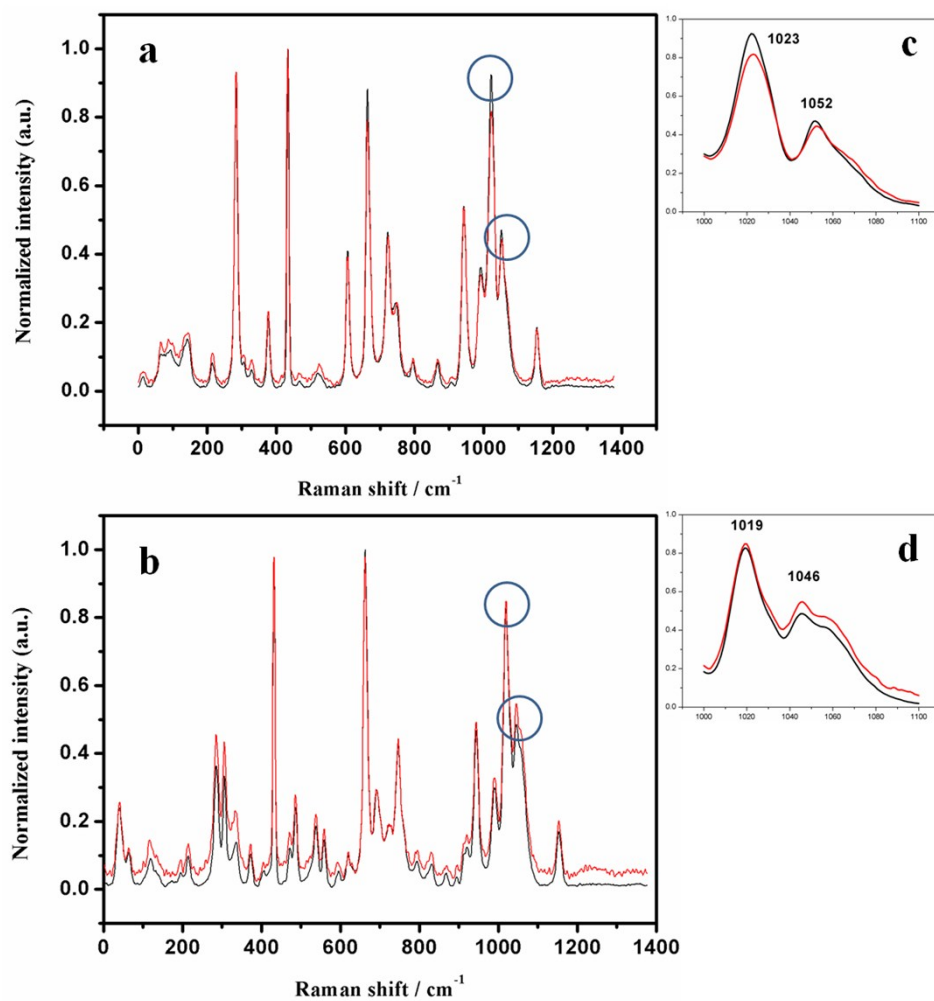

**Figure S8.** Raman spectrum

(a)  $[\text{C}_2\text{mim}]\text{BF}_4$  (the black line) and GSH/ $[\text{C}_2\text{mim}]$  complex (the red line).

(b)  $[\text{C}_4\text{mim}]\text{BF}_4$  (the black line) and BSA/ $[\text{C}_4\text{mim}]$  complex (the red line).

The peaks circled were showed in c and d. The concentrations of all the substances were identical with the ones in the corresponding synthesis system (Table S1, b and c).
